# Supplementary material for: High-resolution Identification and Separation of Living Cell Types by Multiple microRNA-responsive Synthetic mRNAs
Source: PubMed Central journal article supplement (PMC4763229; doi:10.1038/srep21991), 2016-02-23
Supplement: srep21991-s1.pdf [file srep21991-s1.pdf]

**Supplementary information**

# **High-resolution Identification and Separation of Living Cell Types by Multiple microRNA-responsive Synthetic mRNAs**

Kei Endo<sup>\*</sup>, Karin Hayashi, Hirohide Saito<sup>\*</sup>

**Contents:**

- 1. Supplementary Figures 1–8**
- 2. Supplementary Tables 1–5**

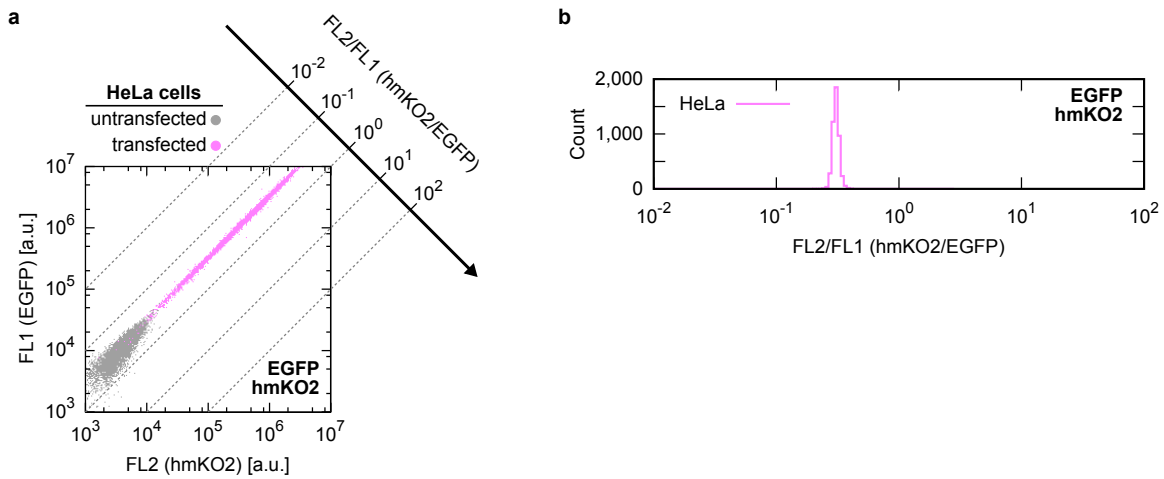

**Supplementary Figure S1. Detecting a cell population as a peak in a histogram of fluorescence ratio.** (a) Dot plot of HeLa cells that were transfected with (transfected, magenta) or without (untransfected, gray) EGFP and hmKO2 mRNAs. The cells were analysed with a flow cytometer 24 h after the transfection. Due to high efficiency of mRNA transfection, almost all the transfected cells in a dish showed both fluorescence signals. Dotted lines denote scales for the fluorescence ratio, FL2/FL1. (b) A fluorescence ratio histogram of the transfected HeLa cells shown in a. The cells can be detected as a sharp peak.

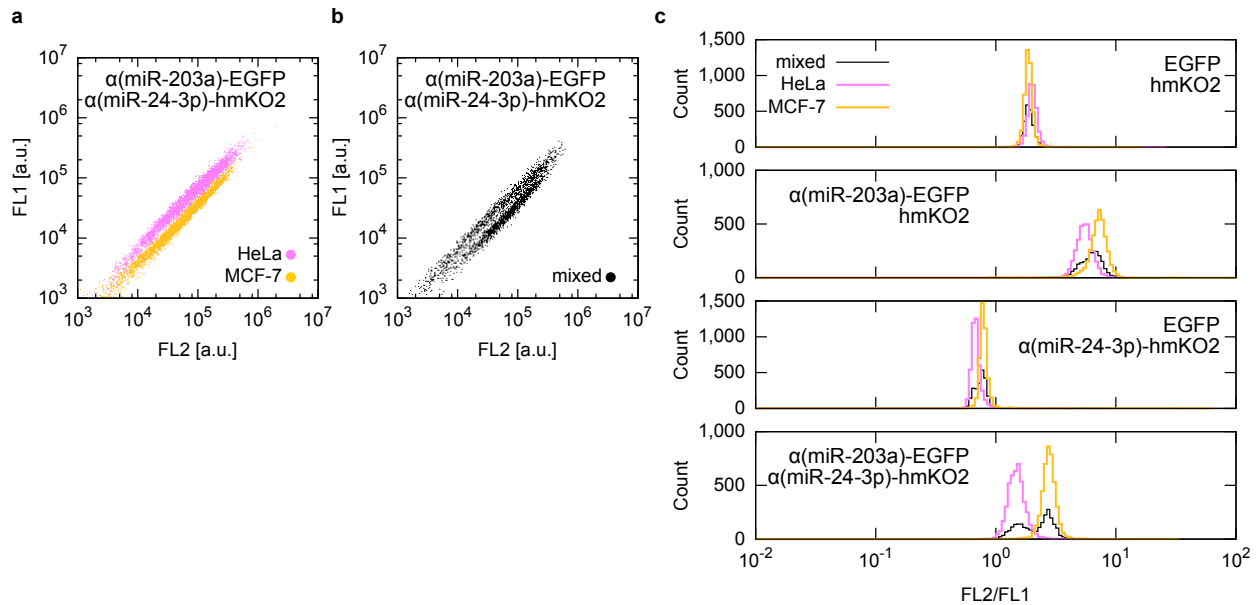

**Supplementary Figure S2. Separation of HeLa and MCF-7 cells with a swapped pair of miRNA-responsive mRNAs.** (a) A dot plot of HeLa (magenta) and MCF-7 (yellow) cells that were individually transfected with an indicated pair of miRNA-responsive mRNAs. The cells were analysed by flow cytometry 24 h after the transfection. (b) A dot plot of the mixture of HeLa and MCF-7 cells transfected with the pair of mRNAs. The cells were analysed by flow cytometry 24 h after the transfection. (c) Histograms of the fluorescence ratio. Individual HeLa (magenta) and MCF-7 (yellow) cells and their mixtures (black) were transfected with the indicated pairs of mRNAs. The ratio of two fluorescence signals (FL2/FL1) in each cell as measured by flow cytometry was calculated and plotted. The swapped mRNA pair separated HeLa cells and MCF-7 cells, but less efficiently than the original pair shown in Figure 2. The results indicate that the combination of miRNA target sites and reporter fluorescent proteins has some impact on the efficiency of HRIC to distinguish cells.

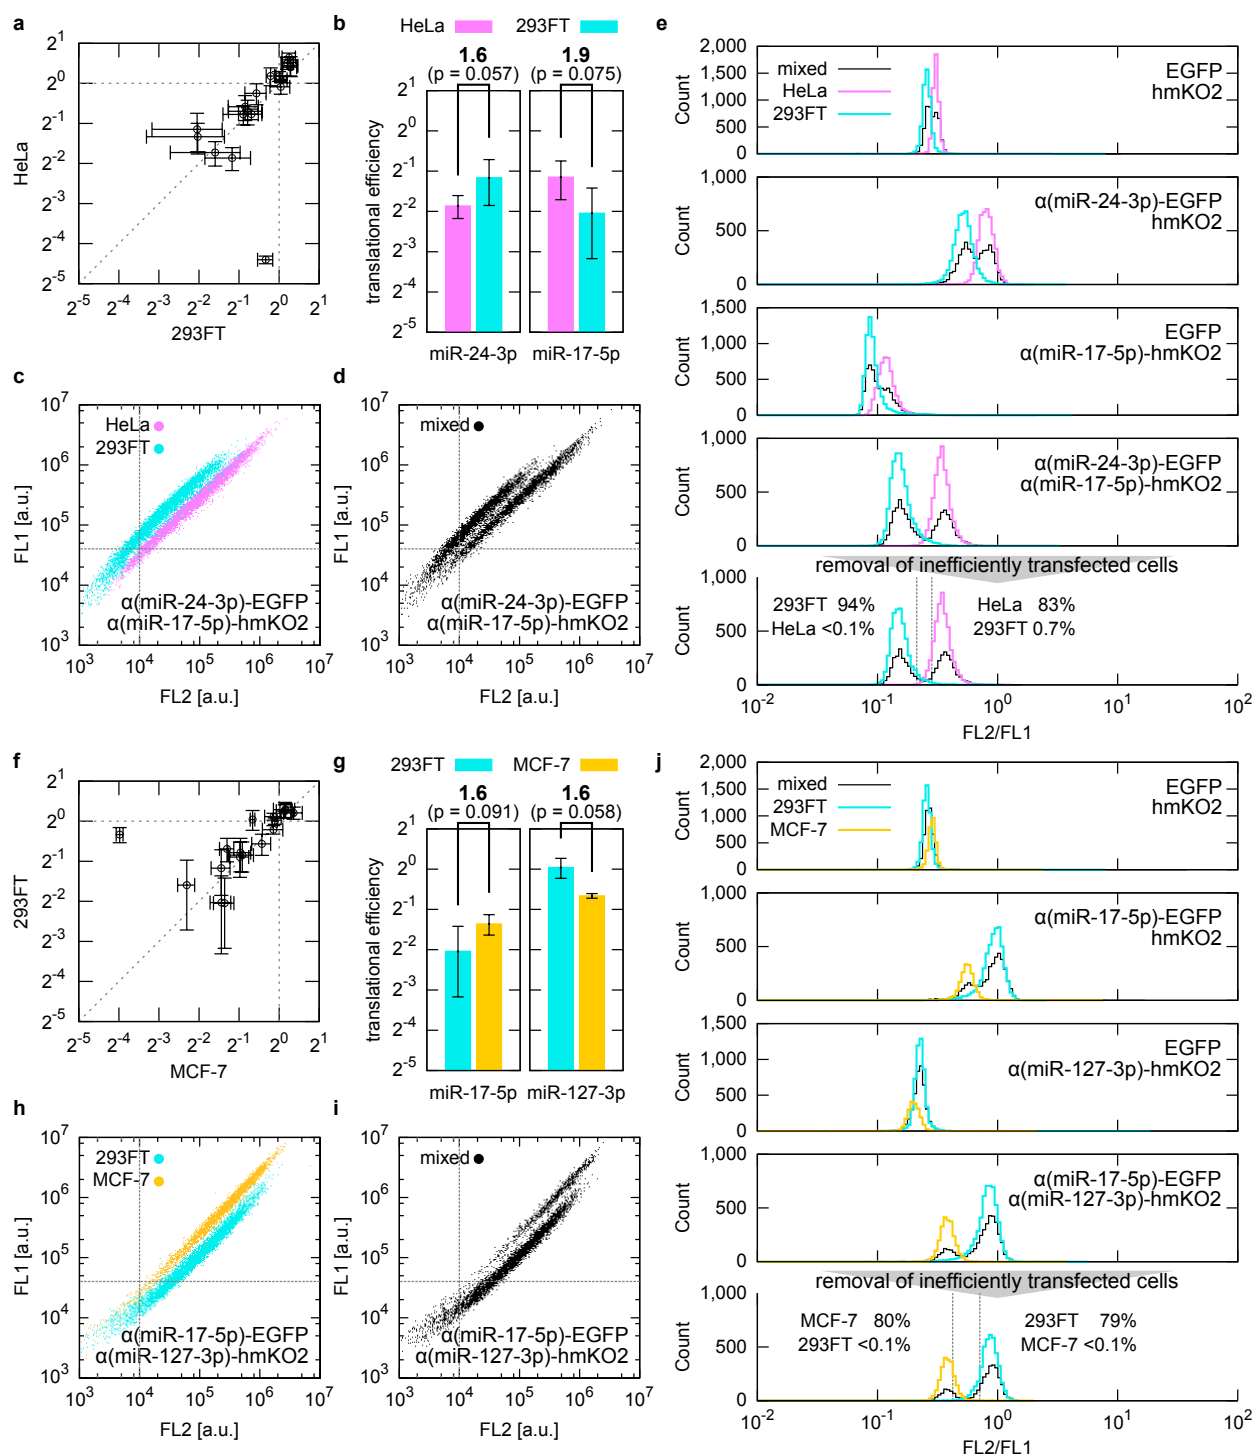

**Supplementary Figure S3. High-resolution identification and separation of two cell lines using two miRNA-responsive mRNAs.** Specific pairs of miRNA-responsive mRNAs, the activity of which differed by less than two-fold, were capable of distinguishing 293FT (cyan)

from HeLa (magenta) (**a–e**) and MCF-7 (yellow) (**f–j**) cells. (**a, f**) Comparison of translational efficiencies between the two cell lines. Error bars indicate the mean  $\pm$  standard deviation ( $n=3$ ) in each line. The translational efficiency of the control EGFP mRNA, which does not contain a miRNA target site, was normalized to 1. The data set is provided in Table S1. (**b, g**) Translational efficiency of two mRNAs responsive to the indicated miRNAs in each line. The numbers on top are the fold-change between the cell lines, followed by p-values within parentheses. Error bars indicate the mean  $\pm$  standard deviation ( $n=3$ ). (**c, d, h, i**) Dot plots of transfected cells. The indicated cell lines (**c, h**) and their mixed population in a dish (black; **d, i**) were transfected with the indicated miRNA-responsive mRNAs and analysed by flow cytometry 24 h after the transfection. Dotted lines denote criteria for removal of inefficiently transfected cells ( $FL1 > 40,000$  and  $FL2 > 10,000$ ). (**e, j**) Histograms of the fluorescence ratios. Individual cell lines and their mixtures (black) were transfected with the indicated pairs of mRNAs. The ratio of two fluorescence signals ( $FL2/FL1$ ) in each cell as measured by flow cytometry was calculated and plotted. The most bottom panels show possible criteria for purification of each cell line with the two miRNA-responsive mRNAs. The criteria are shown as dotted line, and labelled with yields of expected and unexpected cells. In these panels, the inefficiently transfected cells are removed to improve the purity of cells of interest. We can improve resolution of cell separation by using two miRNA-responsive mRNAs.

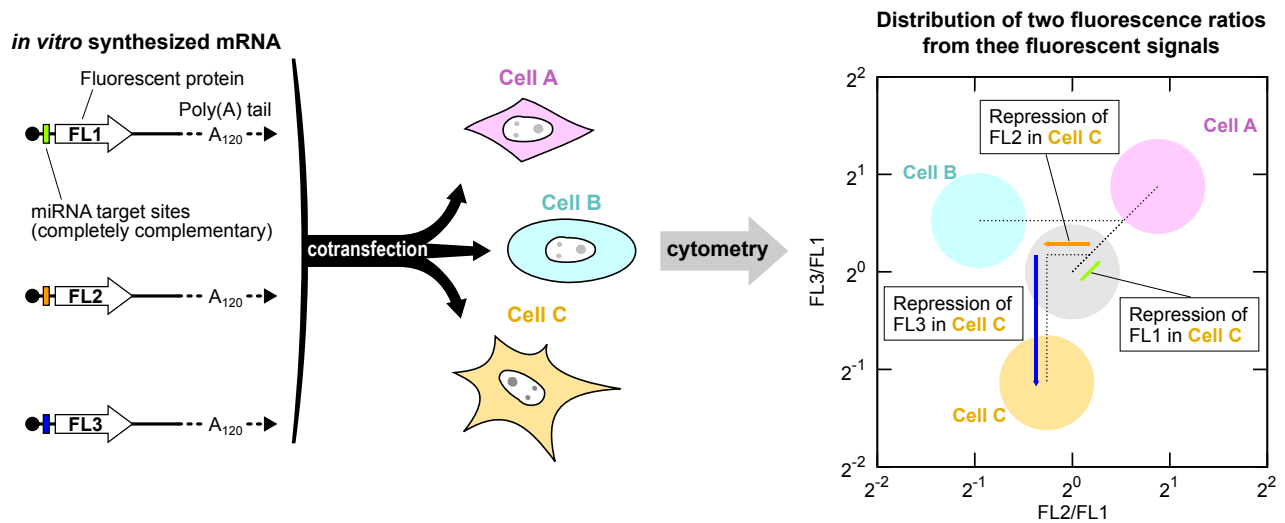

**Supplementary Figure S4. Schematic illustration of two-dimensional (2-D) separation using three miRNA-responsive mRNAs.** Three reporter mRNAs expressing a different fluorescent protein (FL1, FL2 or FL3) and each containing one complementary sequence of one of three miRNAs (miRNA target site) in their 5' UTR were synthesized *in vitro*. Synthetic mRNAs contain an anti-reverse cap analogue (black circle) and a poly(A) tail (120 nucleotides). The mRNAs were mixed and co-transferred into target cells (Cell A, B and C) via lipofection. Twenty-four hours later, the cells were analysed with a flow cytometer. The right panel shows a schematic density plot of the cells using two fluorescence signal ratios (FL2/FL1 and FL3/FL1). Cells A, B and C are shown in magenta, cyan and yellow, respectively. A gray spot denotes the position of the cells with control mRNAs that were not affected by the miRNAs. As an example, the arrows in the plot indicate movement of cell C in accordance with the repression of the three reporter mRNAs by the three different miRNAs.

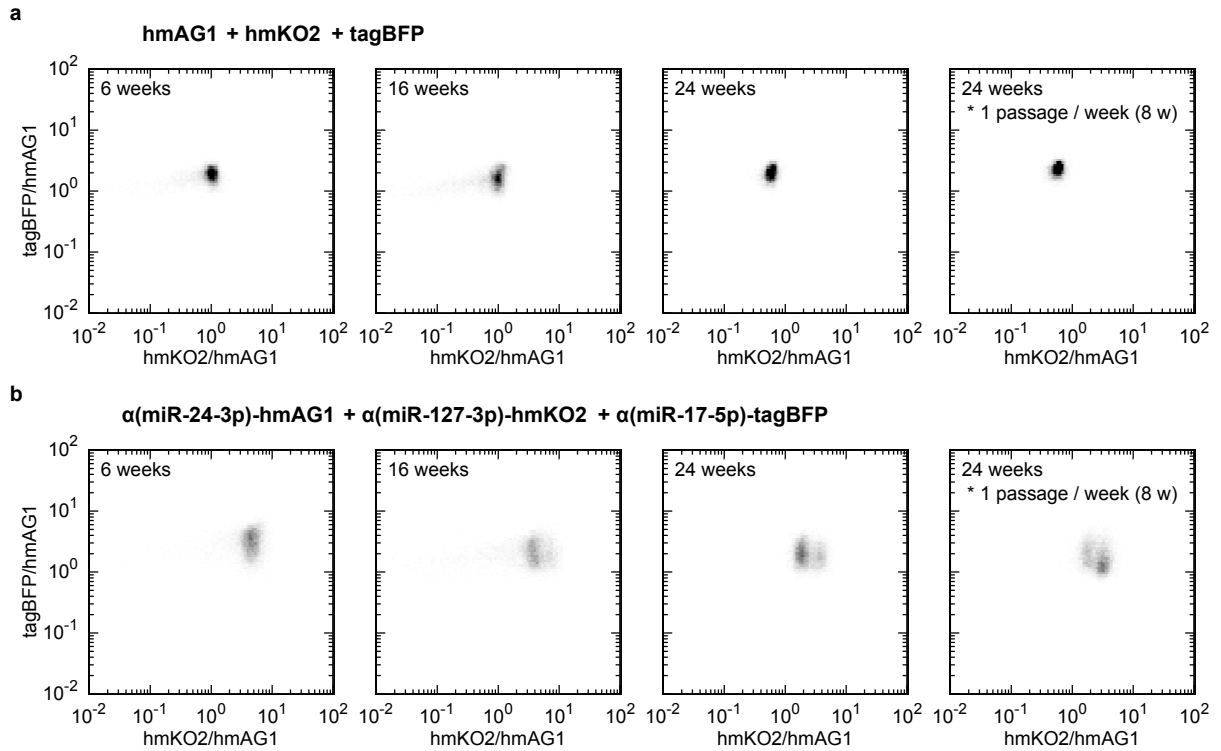

**Supplementary Figure S5. Distribution of subgroups in HeLa cells.** HeLa cells were maintained for 6, 16 and 24 weeks with three passages a week, and then transfected with the control set of three reporter mRNAs (hmAG1, hmKO2 and tagBFP) **(a)** or a specific set **(b)** of three miRNA-responsive reporter mRNAs. In the most right panels, HeLa cells were maintained 16 weeks with three passages a week and then 8 weeks with one passage a week (total 24 weeks). The corresponding mRNAs were transfected into cells at the indicated time, and the transfected cells were analysed with a flow cytometer 24 h after the transfection. Results are shown as a 2-D density plot of two fluorescence ratios. Please note that cell distribution balance shown in **b** was dependent on the number of cell passages and the culture condition (24 weeks).

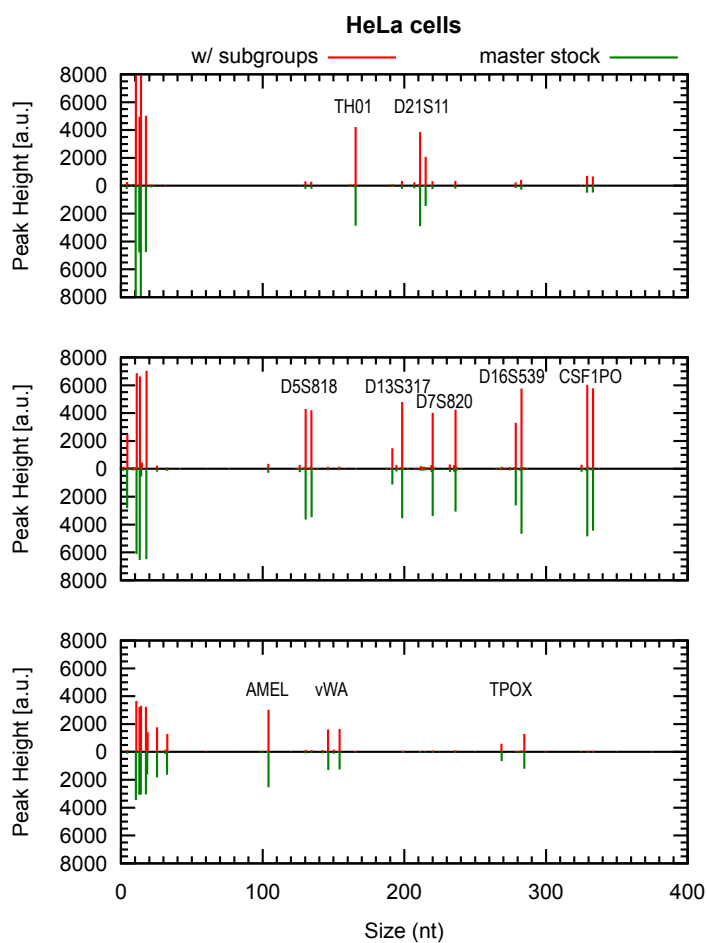

**Supplementary Figure S6. Comparison of HeLa cell populations in STR profiling.** HeLa cells composed of subgroups (“w/ subgroups”, red, upward) and our master stock of HeLa cells that was made after five passages from purchased HeLa cells (“master stock”, green, downward) were subjected to STR profiling of 10 genomic loci. Height and estimated size of detected peaks of amplified fragments are plotted. STR profiles of these two samples are identical to one another.



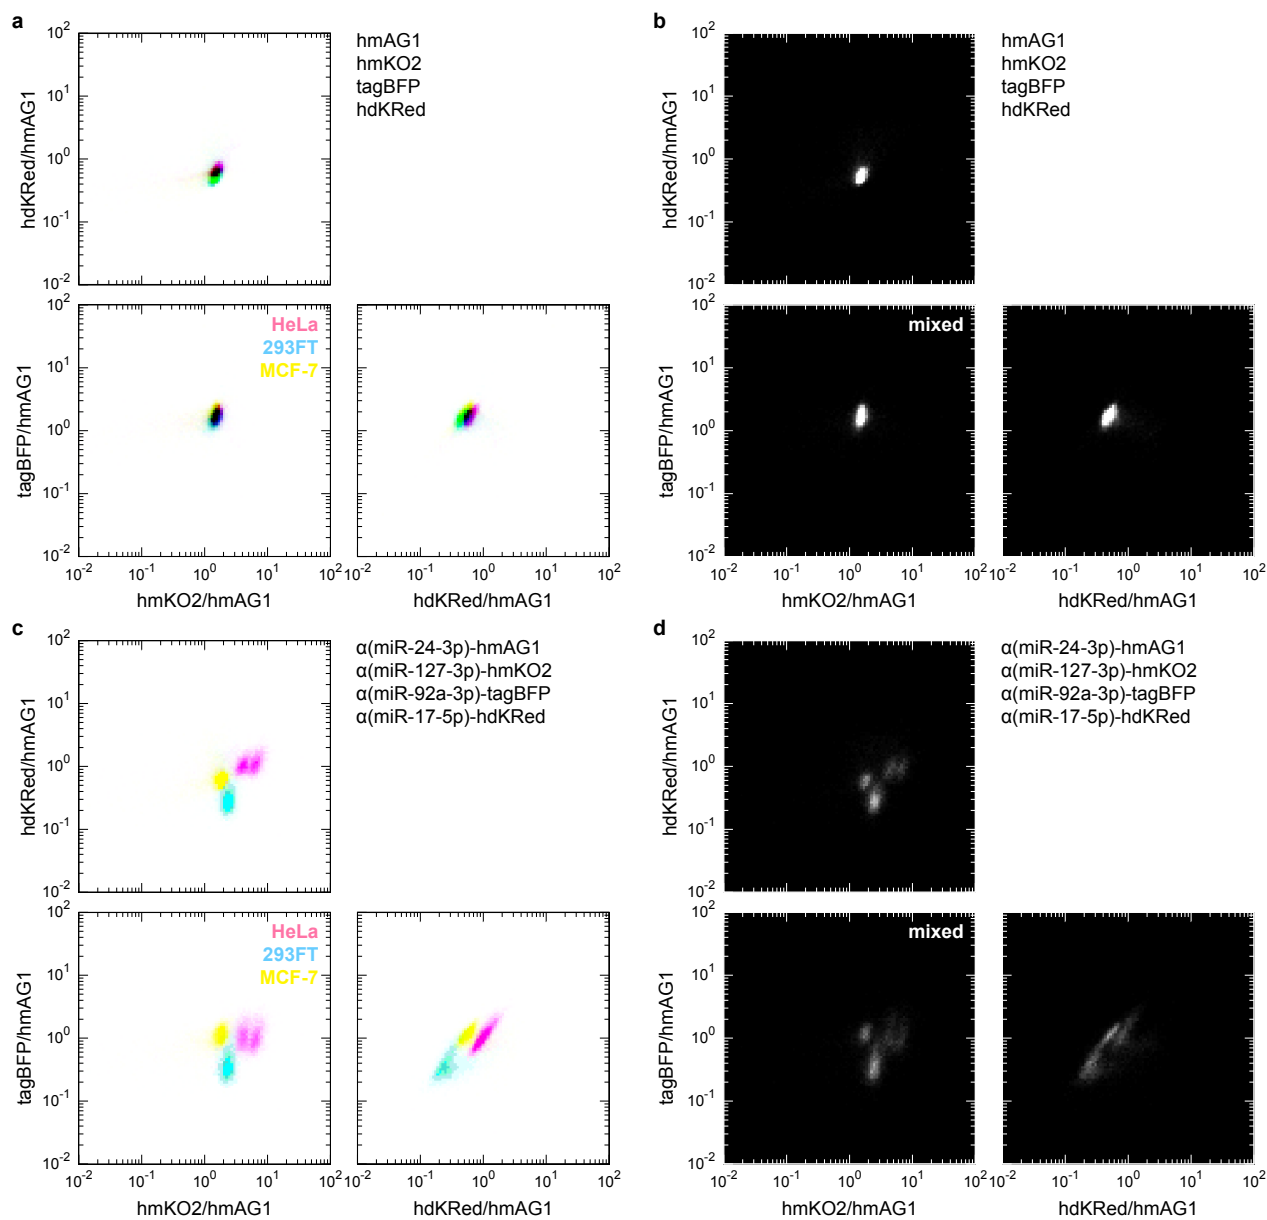

**Supplementary Figure S7. 3-D separation using 4 miRNA-responsive mRNAs.** Sets of 2-D density plots for 3-D separation. HeLa cells (magenta), 293FT cells (cyan), MCF-7 cells (yellow) (**a, c**) or their mixture (**b, d**) were transfected with the control (**a, b**) or a set of four miRNA-responsive reporter mRNAs (**c, d**). The cells were analysed by flow cytometry at 24 h after the transfection. Densities of the cells are plotted on the three planes vertical to the three axes using the fluorescence ratios. Representative results from three independent experiments are shown.

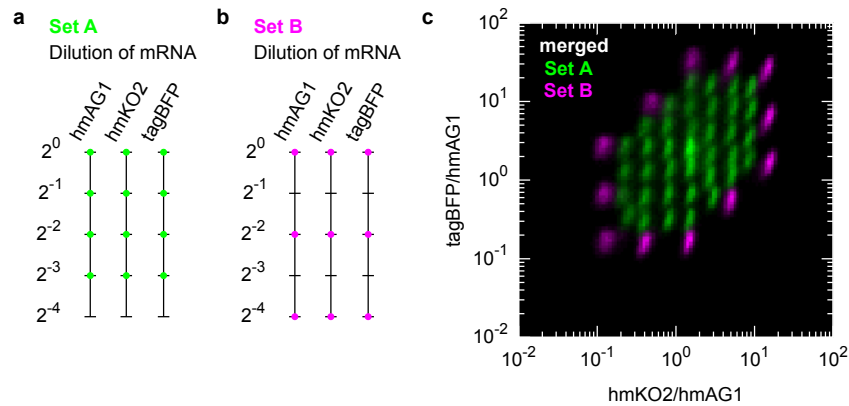

**Supplementary Figure S8. 2-D separation space using 3 fluorescent reporter mRNAs.**

Control hmAG1, hmKO2 and tagBFP mRNAs were serially diluted in two-fold steps and transfected into HeLa cells in various combinations. The dilution of mRNAs mimics the repression by miRNAs in a cell. (a) Combination of the three mRNAs in Set A. Set A covers 2-fold dilution in 4 steps ( $2^0$ ,  $2^{-1}$ ,  $2^{-2}$ ,  $2^{-3}$ ). A combination of the three mRNAs in 2-fold dilution series were tested (See Supplementary Table S3). (b) Combination of the three mRNAs in Set B. Set B includes the 1st, 3rd, and 5th steps of the 2-fold dilution ( $2^0$ ,  $2^{-2}$ ,  $2^{-4}$ ). (c) A 2-D density plot of two fluorescence ratios. HeLa cells were transfected with various combinations of the mRNAs, and 24 h later analysed by a flow cytometer. The averaged density plot of the results from 38 (green, Set A) and 12 (purple, Set B) transfections are merged. Detailed conditions for the transfections are provided in Supplementary Table S3.

**Supplementary Table S1.** List of miRNA-responsive mRNAs used in this study and their translational efficiencies and primers for construction.

| miRNA                          | HeLa                     | 293FT | MCF-7 | Construction | Primer (Pair)                   |                                                                                |
|--------------------------------|--------------------------|-------|-------|--------------|---------------------------------|--------------------------------------------------------------------------------|
| Name (miRBase ID)              | Translational efficiency |       |       |              | Name(s)                         | Sequence(s)                                                                    |
| hsa-miR-133a (MIMAT0000427)    | 0.842                    | 0.677 | 0.743 | plasmid      | 5Tmi133a_Afwd / 5Tmi133a_Arev   | GATCCCAGCTGGTTGAAGGGGACCAAAAAGATCTA / CCGGTAGATCTTTTGGTCCCCTTCAACCAGCTGG       |
| hsa-miR-17-3p (MIMAT0000071)   | 1.131                    | 1.002 | 0.928 | plasmid      | 5Tmi17_3_Afwd / 5Tmi17_3_Arev   | GATCCCTACAAGTGCCTTCACTGCAGTAGATCTA / CCGGTAGATCTACTGCAGTGAAGGCACTTGTAGG        |
| hsa-miR-17-5p (MIMAT0000070)   | 0.451                    | 0.242 | 0.389 | plasmid      | 5Tmi17_5_Afwd / 5Tmi17_5_Arev   | GATCCCTACCTGCACTGTAAGCACTTTGAGATCTA / CCGGTAGATCTCAAAGTGCTTACAGTGCAGGTAGG      |
| hsa-miR-1 (MIMAT0000416)       | 1.675                    | 1.328 | 1.345 | plasmid      | 5Tmi1_Afwd / 5Tmi1_Arev         | GATCCATACATACTTCTTTACATTTCCAAGATCTA / CCGGTAGATCTTGGAAATGTAAGAAGTATGTATG       |
| hsa-miR-206 (MIMAT0000462)     | 1.565                    | 1.190 | 1.104 | plasmid      | 5Tmi206_Afwd / 5Tmi206_Arev     | GATCCCCACACACTTCCTTACATTTCCAAGATCTA / CCGGTAGATCTTGGAAATGTAAGAAGTGTGTGGG       |
| hsa-miR-21-5p (MIMAT0000076)   | 0.047                    | 0.793 | 0.063 | plasmid      | 5Tmi21_Afwd / 5Tmi21_Arev       | GATCCTCAACATCAGTCTGATAAGCTAAGATCTA / CCGGTAGATCTTAGCTTATCAGACTGATGTTGAG        |
| hsa-miR-367-3p (MIMAT0000719)  | 1.419                    | 1.156 | 1.286 | plasmid      | 5Tmi367_Afwd / 5Tmi367_Arev     | GATCCTCACCATTGCTAAAGTGCAATTAGATCTA / CCGGTAGATCTAATTGCACCTTTAGCAATGGTGAG       |
| hsa-miR-373-5p (MIMAT0000725)  | 1.292                    | 1.149 | 1.031 | plasmid      | 5Tmi373_5_Afwd / 5Tmi373_5_Arev | GATCCGGAAAGCGCCCCATTTTGGAGTAGATCTA / CCGGTAGATCTACTCAAATGGGGCGCTTTCCG          |
| hsa-miR-92a-3p (MIMAT0000092)  | 0.398                    | 0.245 | 0.368 | oligoDNA     | 5UTR-T92a-3p                    | CGACTCACTATAGGTCAGATCCGCTAGGATCCACAGGCCGGGA CAAGTGCAATAAGATCTACCGGTCGCCACCATG  |
| hsa-miR-16-5p (MIMAT0000069)   | 0.587                    | 0.620 | 0.406 | oligoDNA     | 5UTR-T16-5p                     | CGACTCACTATAGGTCAGATCCGCTAGGATCCCGCCAATATTT ACGTGCTGCTAAGATCTACCGGTCGCCACCATG  |
| hsa-miR-197-3p (MIMAT0000227)  | 0.667                    | 0.557 | 0.528 | oligoDNA     | 5UTR-T197-3p                    | CGACTCACTATAGGTCAGATCCGCTAGGATCCGCTGGGTGGAG AAGGTGGTGAAAGATCTACCGGTCGCCACCATG  |
| hsa-miR-24-3p (MIMAT0000080)   | 0.275                    | 0.444 | 0.368 | oligoDNA     | 5UTR-T24-3p                     | CGACTCACTATAGGTCAGATCCGCTAGGATCCCTGTTCTCTGCT GAAGTGAGCCAAGATCTACCGGTCGCCACCATG |
| hsa-miR-339-5p (MIMAT0000764)  | 1.134                    | 0.863 | 0.907 | oligoDNA     | 5UTR-T339-5p                    | CGACTCACTATAGGTCAGATCCGCTAGGATCCCGTGAGCTCCT GGAGGACAGGGAAGATCTACCGGTCGCCACCATG |
| hsa-miR-224-5p (MIMAT0000281)  | 1.321                    | 1.211 | 1.120 | oligoDNA     | 5UTR-T224-5p                    | CGACTCACTATAGGTCAGATCCGCTAGGATCCAACGGAAACCAC TAGTGACTTGAGATCTACCGGTCGCCACCATG  |
| hsa-miR-127-3p (MIMAT0000446)  | 0.943                    | 1.029 | 0.631 | oligoDNA     | 5UTR-T127-3p                    | CGACTCACTATAGGTCAGATCCGCTAGGATCCAGCCAAGCTCA GACGGATCCGAAGATCTACCGGTCGCCACCATG  |
| hsa-miR-365a-3p (MIMAT0000710) | 1.074                    | 1.082 | 0.907 | oligoDNA     | 5UTR-T365a-3p                   | CGACTCACTATAGGTCAGATCCGCTAGGATCCATAAGGATTTT TAGGGGCATTAAGATCTACCGGTCGCCACCATG  |
| hsa-miR-183-5p (MIMAT0000261)  | 1.355                    | 1.222 | 1.108 | oligoDNA     | 5UTR-T183-5p                    | CGACTCACTATAGGTCAGATCCGCTAGGATCCAGTGAATTCTA CCAGTGCCATAAGATCTACCGGTCGCCACCATG  |

|                                  |       |       |       |          |              |                                                                                  |
|----------------------------------|-------|-------|-------|----------|--------------|----------------------------------------------------------------------------------|
| hsa-miR-331-3p<br>(MIMAT0000760) | 0.584 | 0.539 | 0.508 | oligoDNA | 5UTR-T331-3p | CGACTCACTATAGGTCAGATCCGCTAGGATCCTTCTAGGATAG<br>GCCCAGGGGCAGATCTACCGGTCGCCACCATG  |
| hsa-miR-203a<br>(MIMAT0000264)   | 0.302 | 0.331 | 0.202 | oligoDNA | 5UTR-T203a   | CGACTCACTATAGGTCAGATCCGCTAGGATCCCTAGTGGTCCT<br>AAACATTTACAGATCTACCGGTCGCCACCATG  |
| hsa-miR-214-3p<br>(MIMAT0000271) | 0.617 | 0.581 | 0.512 | oligoDNA | 5UTR-T214-3p | CGACTCACTATAGGTCAGATCCGCTAGGATCCACTGCCTGTCT<br>GTGCCTGCTGTAGATCTACCGGTCGCCACCATG |

**Supplementary Table S2.** STR profiling of the cell lines used in this study.

| Locus   | HaLa         |      |              |      | 293FT |     | MCF-7 |    |
|---------|--------------|------|--------------|------|-------|-----|-------|----|
|         | w/ subgroups |      | Master stock |      |       |     |       |    |
| TH01    | 7            |      | 7            |      | 7     | 9.3 | 6     |    |
| D21S11  | 27           | 28   | 27           | 28   | 30.2  |     | 30    |    |
| D5S818  | 11           | 12   | 11           | 12   | 8     | 9   | 11    | 12 |
| D13S317 | 12           | 13.3 | 12           | 13.3 | 12    | 14  | 11    |    |
| D7S820  | 8            | 12   | 8            | 12   | 11    |     | 8     | 9  |
| D16S539 | 9            | 10   | 9            | 10   | 9     | 13  | 11    | 12 |
| CSF1PO  | 9            | 10   | 9            | 10   | 7     | 12  | 10    |    |
| AMEL    | X            |      | X            |      | X     |     | X     |    |
| vWA     | 16           | 18   | 16           | 18   | 16    | 19  | 14    | 15 |
| TPOX    | 8            | 12   | 8            | 12   | 11    |     | 9     | 12 |

**Supplementary Table S3.** Combinations of diluted reporter mRNAs used in Figure S6.

| Set | Dilution factor  |                  |                    |
|-----|------------------|------------------|--------------------|
|     | hmAG1<br>(40 ng) | hmKO2<br>(10 ng) | tagBFP<br>(200 ng) |
| A   | 1                | 1                | 1                  |
| A   | 1                | 1                | 2                  |
| A   | 1                | 1                | 4                  |
| A   | 1                | 1                | 8                  |
| A   | 1                | 2                | 1                  |
| A   | 1                | 2                | 2                  |
| A   | 1                | 2                | 4                  |
| A   | 1                | 2                | 8                  |
| A   | 1                | 4                | 1                  |
| A   | 1                | 4                | 2                  |
| A   | 1                | 4                | 4                  |
| A   | 1                | 4                | 8                  |
| A   | 1                | 8                | 1                  |
| A   | 1                | 8                | 2                  |
| A   | 1                | 8                | 4                  |
| A   | 1                | 8                | 8                  |
| A   | 8                | 1                | 1                  |
| A   | 8                | 1                | 2                  |
| A   | 8                | 1                | 4                  |
| A   | 8                | 1                | 8                  |
| A   | 8                | 2                | 1                  |
| A   | 8                | 2                | 2                  |
| A   | 8                | 2                | 4                  |
| A   | 8                | 2                | 8                  |
| A   | 8                | 4                | 1                  |
| A   | 8                | 4                | 2                  |
| A   | 8                | 4                | 4                  |
| A   | 8                | 4                | 8                  |
| A   | 8                | 8                | 1                  |
| A   | 8                | 8                | 2                  |
| A   | 8                | 8                | 4                  |
| A   | 8                | 8                | 8                  |
| A   | 2                | 1                | 8                  |
| A   | 2                | 8                | 1                  |
| A   | 4                | 1                | 8                  |
| A   | 4                | 2                | 8                  |
| A   | 4                | 8                | 1                  |
| A   | 4                | 8                | 2                  |

| Set | Dilution factor  |                  |                    |
|-----|------------------|------------------|--------------------|
|     | hmAG1<br>(40 ng) | hmKO2<br>(10 ng) | tagBFP<br>(200 ng) |
| B   | 1                | 1                | 16                 |
| B   | 1                | 4                | 16                 |
| B   | 1                | 16               | 1                  |
| B   | 1                | 16               | 4                  |
| B   | 1                | 16               | 16                 |
| B   | 4                | 1                | 16                 |
| B   | 4                | 16               | 1                  |
| B   | 16               | 1                | 1                  |
| B   | 16               | 1                | 4                  |
| B   | 16               | 1                | 16                 |
| B   | 16               | 4                | 1                  |
| B   | 16               | 16               | 1                  |

**Supplementary Table S4.** List of oligoDNAs used in this study.

| Type of DNA | Type of target | Primer name | Sequence (5' to 3')                                                                                                                                                  | Template for PCR                    |
|-------------|----------------|-------------|----------------------------------------------------------------------------------------------------------------------------------------------------------------------|-------------------------------------|
| Forward     | ORF            | FwdEGFP     | CACCGGTCGCCACCATGGGATCCGTGAGCAAGGGC                                                                                                                                  | pEGFP-N1<br>(Clontech)              |
| Reverse     | ORF            | RevEGFP     | GCCCCGAGAAGGTCTAGACCTACTTGTACAGCTCGTCCATGCCG                                                                                                                         |                                     |
| Forward     | ORF            | FwdtagBFP   | CACCGGTCGCCACCATGGGATCCAGCGAG                                                                                                                                        | pSRT-tagBFP<br>(this study)         |
| Reverse     | ORF            | RevtagBFP   | GCCCCGAGAAGGTCTAGACTATCACTCGAGATGCATATGAGATC                                                                                                                         |                                     |
| Forward     | ORF            | FwdhmAG1    | CACCGGTCGCCACCATGGTGTGAGCGTGATCAAGCCCG                                                                                                                               | pFucci-S/G2/M<br>Green (Amargaam)   |
| Reverse     | ORF            | RevhmAG1    | GCCCCGAGAAGGTCTAGATTCACCTTGCCCTGGCTGGGC                                                                                                                              |                                     |
| Forward     | ORF            | FwdhmKO2    | CACCGGTCGCCACCATGGTGTGAGTGTGATTAACCAGAGATG                                                                                                                           | pFucci-G1 Orange<br>(Amargaam)      |
| Reverse     | ORF            | RevhmKO2    | GCCCCGAGAAGGTCTAGATTCAGGAATGAGCTACTGCATCTTCTACCTG                                                                                                                    |                                     |
| Forward     | ORF            | FwdhdKRed   | CACCGGTCGCCACCATGGTGTGAGCGTGATCGCCAAG                                                                                                                                | pNP-hdKeima-Red<br>(Amargaam)       |
| Reverse     | ORF            | RevhdKRed   | GCCCCGAGAAGGTCTAGATTCAGCCAGCAGGCTGTGC                                                                                                                                |                                     |
| Forward     | ORF            | FwdCBG68    | CACCGGTCGCCACCATGGTGAACCGCGA                                                                                                                                         | pCBG68-Control<br>(Promega)         |
| Reverse     | ORF            | RevCBG68    | GCCCCGAGAAGGTCTAGATTTACTAGCCGCCAGCTTTTTTCG                                                                                                                           |                                     |
| Reverse     | ORF            | RevM9       | GCCCCGAGAAGGTCTAGACTATCACTCGAGATGCATATGAGATC                                                                                                                         |                                     |
| Forward     | 5' UTR         | Fwd5UTR     | CAGTGAATTGTAATACGACTCACTATAG                                                                                                                                         | temp5UTR                            |
| Reverse     | 5' UTR         | Rev5UTR     | CATGGTGGCGACCGGTGTCTTATATTTCTTCTTACTC                                                                                                                                |                                     |
| Template    | 5' UTR         | temp5UTR    | CAGTGAATTGTAATACGACTCACTATAGGGCGAATTAAGAGAGAAAAGAA<br>GAGTAAGAAGAAATATAAGACACCGGTCGCCACCATG                                                                          |                                     |
| Forward     | 3' UTR         | Fwd3UTR     | TCTAGACCTTCTGCGGGGC                                                                                                                                                  | temp3UTR                            |
| Reverse     | 3' UTR         | Rev3UTR     | TTTTTTTTTTTTTTTTTTTTTCCCTACTCAGGCTTATTCAAAGACCAAG                                                                                                                    |                                     |
| Template    | 3' UTR         | temp3UTR    | TCTAGACCTTCTGCGGGGCTTGCCCTTCTGGCCATGCCCTTCTTCTCCTCC<br>TTGCACCTGTACCTCTTGGTCTTTGAATAAAGCCTGAGTAGG                                                                    |                                     |
| Forward     | IVT            | T7Fwd5UTR   | CAGTGAATTGTAATACGACTCACTATAG                                                                                                                                         |                                     |
| Forward     | IVT            | T7FwdA      | GCTAATACGACTCACTATAGGTCAGATCCGCTAGGATC                                                                                                                               |                                     |
| Reverse     | IVT            | Rev120A     | TTTTTTTTTTTTTTTTTTTTTTTTTTTTTTTTTTTTTTTTTTTTTTTTTTTTTTTT<br>TTTTTTTTTTTTTTTTTTTTTTTTTTTTTTTTTTTTTTTTTTTTTTTTTTTTTTTT<br>TTTTTTTTTTTTTTTTTTTTTTTTTCCCTACTCAGGCTTATTCA |                                     |
| Forward     | vector         | FwdMCS      | GGGATCCCATGGTGTGACCTGCAGCATATGAGCTCCTGAATTCGCCCTA<br>TAGTGAGTCG                                                                                                      | pGEM-T easy<br>(Promega)            |
| Reverse     | vector         | RevMCS      | GGGAGATCTCATATGCATCTCGAGTGATAGTCTAGACAAGCTTGAGTATT<br>CTATAGTGTACC                                                                                                   |                                     |
| Insertion   | vector         | Code5UTR    | AATTAAGAGAGAAAAGAAGAGTAAGAAGAAATATAAGAGCCAC                                                                                                                          |                                     |
| Insertion   | vector         | Comp5UTR    | CATGGTGGCTCTTATATTTCTTCTTACTCTTCTTTCTCTCTT                                                                                                                           |                                     |
| Insertion   | vector         | Code3UTR    | CTAGACCTTCTGCGGGGCTTGCCCTTCTGGCCATGCCCTTCTTCTCCTCC<br>TGACCTGTACCTCTTGGTCTTTGAATAAAGCCTGAGTAGGA                                                                      |                                     |
| Insertion   | vector         | Comp3UTR    | AGCTTCCTACTCAGGCTTTATTCAAAGACCAAGAGGTACAGGTGCAAGGG<br>AGAGAAGAAGGGCATGGCCAGAAGGCAAGCCCCGAGAAGGT                                                                      |                                     |
| Forward     | cloning        | CFwdtagRFP  | GCCACCATGGGATCCGTGTCTAAGGGCGAAGAGC                                                                                                                                   | pTagRFP-actin<br>(Evarogen)         |
| Reverse     | cloning        | CRevtagRFP  | GCTCGAGATCTATTAAGTTTGTGCCCCAGT                                                                                                                                       |                                     |
| Forward     | cloning        | CFwdtagBFP  | GCCACCATGGGATCCAGCGAGCTGATTAAGGAGAAC                                                                                                                                 | pTagBFP-Tubulin<br>(Evarogen)       |
| Reverse     | cloning        | CRevtagBFP  | ACTCGAGATCTGTGCCCCAGTTTGCTAG                                                                                                                                         |                                     |
| Forward     | cloning        | CFwdhmAG1   | GCCACCATGGGATCCGTGTGAGCGTGATCAAGCCCG                                                                                                                                 | pFucci-S/G2/M<br>Green (Amargaam)   |
| Reverse     | cloning        | CRevhmAG1   | TATGAGATCTCTTGCCCTGGCTGGGC                                                                                                                                           |                                     |
| Forward     | cloning        | CFwdhmKO2   | GCCACCATGGGATCCGTGTGAGTGTGATTAACCAGAGATG                                                                                                                             | pFucci-G1 Orange<br>(Amargaam)      |
| Reverse     | cloning        | CRevhmKO2   | TATGAGATCTGGAATGAGCTACTGCATCTTCTACCTG                                                                                                                                |                                     |
| Forward     | cloning        | FwdM9       | GAGATCCATGGGATCCAATCAGTCTTCAAATTTGGAC                                                                                                                                | p4LambdaN22-3m<br>EGFP-M9 (ref. 23) |
| Reverse     | cloning        | RevSV40     | CTTTATTTGTAACCATTATAAGCTGC                                                                                                                                           |                                     |

**Supplementary Table S5.** List of experimental conditions.

| <b>Experiment</b>                          | <b>Item</b>                                   | <b>Cell</b>        | <b>Transfected RNA</b>                                                                                                                   | <b>Analyzer</b>       |
|--------------------------------------------|-----------------------------------------------|--------------------|------------------------------------------------------------------------------------------------------------------------------------------|-----------------------|
| Translational efficiency                   | Fig. 2a, 2b, 3a, S3a, S3b, S3f, S3g, Table S1 | HeLa, 293FT, MCF-7 | miRNA-responsive EGFP (100 ng)<br>tagRFP (control, 100 ng)                                                                               | Accuri C6             |
| Two-cell separation                        | Fig. 2b–e, S2, S3c–e, S3h–j                   | HeLa, 293FT, MCF-7 | miRNA-responsive EGFP (100 ng)<br>miRNA-responsive hmKO2 (125 ng)                                                                        | Accuri C6             |
| 2-D cell separation                        | Fig. 3b–e, S5                                 | HeLa, 293FT, MCF-7 | miRNA-responsive hmAG1 (40 ng)<br>miRNA-responsive hmKO2 (10 ng)<br>miRNA-responsive tagBFP (200 ng)                                     | FACSAria II           |
| 3-D cell separation                        | Fig. 3f, S7                                   | HeLa, 293FT, MCF-7 | miRNA-responsive hmAG1 (40 ng)<br>miRNA-responsive hmKO2 (10 ng)<br>miRNA-responsive tagBFP (200 ng)<br>miRNA-responsive hdKRed (250 ng) | FACSAria II           |
| 2-D separation space                       | Fig. S8, Table S3                             | HeLa               | hmAG1 (control, 40 ng)<br>hmKO2 (control, 10 ng)<br>tagBFP (control, 200 ng)                                                             | FACSAria II           |
| Cell identification with imaging cytometry | Fig. 4                                        | HeLa, 293FT, MCF-7 | miRNA-responsive hmAG1 (40 ng)<br>miRNA-responsive hmKO2 (10 ng)<br>miRNA-responsive tagBFP (200 ng)                                     | IN Cell Analyzer 6000 |
